# Supplementary material for: Tracking the COVID-19 pandemic in Australia using genomics
Source: PubMed Central journal article supplement (PMC7462846; doi:10.1038/s41467-020-18314-x), 2020-09-01
Supplement: 41467_2020_18314_MOESM3_ESM.pdf [file 41467_2020_18314_MOESM3_ESM.pdf]

## **Descriptions of Additional Supplementary Files**

### **Supplementary Data 1**

**Description:** Included sequences, sequencing information, lineages and accession numbers.

### **Supplementary Data 2**

**Description:** Primer sequences for ARTIC protocol tiled amplicon PCR.

### **Supplementary Data 3**

**Description:** Acknowledgement of contributors to GISAID for sequences used in Figure 2.
